# Supplementary material for: Within-host adaptive speciation of commensal yoyo clams leads to ecological exclusion, not co-existence
Source: PeerJ. 2024 Aug 5;12:e17753. doi: 10.7717/peerj.17753 (PMC11308998; doi:10.7717/peerj.17753)
Supplement: Table S1 — “Site” refers to the respective 5 sampling sites (Figure 2): S1 (Spoil Island 17N), S2 (Fort Beach), S3 (SE Causeway), S4 (Coon Island) and S5 (Spoil Island 83 N). “ID” refers to individual sampled host burrows at that study site yielding ≥1 commensal clam(s). The following abbreviations are used for the 7 known IRL vasonielline commensal species: Divariscintilla octotentaculata (Octo), D. troglodytes (Trog), “Parabornia” squillina (Squill), D. luteocrinita (Luteo), D. cordiformis (Cord), D. yoyo (Yoyo), D. aff. yoyo (AY). [file peerj-12-17753-s003.xlsx]

## Sheet: Table 1
Site	ID	NClams	NSpp	Octo	Trog	Squill	Luteo	Cord	Yoyo	AY
S1	S101	5	1	0	0	5	0	0	0	0
S1	S102	1	1	0	0	1	0	0	0	0
S1	S104	1	1	1	0	0	0	0	0	0
S1	S105	3	1	3	0	0	0	0	0	0
S1	S107	2	1	2	0	0	0	0	0	0
S1	S109	3	2	2	0	0	1	0	0	0
S1	S111	1	1	0	0	0	1	0	0	0
S1	S113	5	2	3	0	0	2	0	0	0
S1	S114	6	1	6	0	0	0	0	0	0
S1	S115	1	1	1	0	0	0	0	0	0
			Mean/Burr	2.57	0	3	1.33	0	0	0
			N Burrows	7	0	2	3	0	0	0
Site	ID	NClams	NSpp	Octo	Trog	Squill	Luteo	Cord	Yoyo	AY
S2	S202	1	1	0	0	1	0	0	0	0
S2	S204	1	1	0	0	1	0	0	0	0
			Mean/Burr	0	0	1	0	0	0	0
			N Burrows	0	0	2	0	0	0	0
Site	ID	NClams	NSpp	Octo	Trog	Squill	Luteo	Cord	Yoyo	AY
S3	S301	2	1	0	0	2	0	0	0	0
S3	S302	4	1	0	0	4	0	0	0	0
S3	S304	4	3	2	1	0	1	0	0	0
S3	S305	1	1	0	0	0	1	0	0	0
S3	S307	1	1	0	0	0	1	0	0	0
S3	S311	9	1	9	0	0	0	0	0	0
S3	S312	1	1	1	0	0	0	0	0	0
S3	S313	21	3	17	0	0	2	0	2	0
S3	S314	13	2	11	0	0	2	0	0	0
S3	S315	3	1	3	0	0	0	0	0	0
S3	S316	1	1	1	0	0	0	0	0	0
			Mean/Burr	6.28	1	3	1.4	0	2	0
			N Burrows	7	1	2	5	0	1	0
Site	ID	NClams	NSpp	Octo	Trog	Squill	Luteo	Cord	Yoyo	AY
S4	S401	5	3	2	2	0	0	0	0	1
S4	S403	1	1	0	0	1	0	0	0	0
S4	S404	5	1	0	0	5	0	0	0	0
			Mean/Burr	2	2	3	0	0	0	1
			N Burrows	1	1	2	0	0	0	1
Site	ID	NClams	NSpp	Octo	Trog	Squill	Luteo	Cord	Yoyo	AY
S5	S501	2	1	2	0	0	0	0	0	0
S5	S502	1	1	1	0	0	0	0	0	0
S5	S503	8	2	6	0	0	2	0	0	0
			Mean/Burr	3	0	0	2	0	0	0
			N Burrows	3	0	0	1	0	0	0
TOTAL				Octo	Trog	Squill	Luteo	Cord	Yoyo	AY
Mean/Burr				4.05	1.5	2.5	1.44	0	2	1
N Burrows				18	2	8	9	0	1	1
