# Supplementary material for: Within-host adaptive speciation of commensal yoyo clams leads to ecological exclusion, not co-existence
Source: PeerJ. 2024 Aug 5;12:e17753. doi: 10.7717/peerj.17753 (PMC11308998; doi:10.7717/peerj.17753)
Supplement: Table S2 — Mantle lengths are measured in millimeters and the 6 commensal species are indicated as follows: Divariscintilla octotentaculata (O), “Parabornia” squillina (S), D. luteocrinita (L), D. troglodytes (T), D. yoyo (Y), D. aff. yoyo (AY). [file peerj-12-17753-s004.xlsx]

## Sheet: Table 1
	Min. Mantle Length	Max. Mantle Length	Mean Mantle Length
O	2.5	5.9	4.4
S	2.95	7.7	6.32
L	2.9	8.3	5.33
T	6.1	13.3	9.26
Y	6.2	7.2	6.77
AY	9.5	9.5	N/A (N = 1)
