# Supplementary material for: Within-host adaptive speciation of commensal yoyo clams leads to ecological exclusion, not co-existence
Source: PeerJ. 2024 Aug 5;12:e17753. doi: 10.7717/peerj.17753 (PMC11308998; doi:10.7717/peerj.17753)
Supplement: Table S3 — The “Burrow ID” column refers to the respective individual host burrows that samples were retrieved from, and sampling sites are identified by the respective Burrow ID pre-fixes: S1 (Spoil Island 17N), S2 (Fort Beach), S3 (SE Causeway), S4 (Coon Island) and S5 (Spoil Island 83 N) –see Figure 2. The “Type” column identifies the sample category: Sediment (burrow-wall sediment sample), Clam (commensal clam sample), Shrimp (mantis shrimp host sample), POM (burrow-water particulate organic matter sample) and the individual vasonielline commensal clam species are identified in the “Species” column as follows: Divariscintilla octotentaculata (O), D. troglodytes (T), “Parabornia” squillina (P), D. luteocrinita (L), D. yoyo (Y). [file peerj-12-17753-s005.xlsx]

## Sheet: Table 1
burrow	id	type	species	size	13c	15n
S101		Sediment			-22.66	1.03
S102		Sediment			-22.94	2.8
S103		Sediment			-22.54	1.21
S104		Sediment			-23.02	2.76
S108		Sediment			-21.79	3.25
S109		Sediment			-22.35	3.47
S202		Sediment			-21.63	3.86
S203		Sediment			-21.38	3.12
S305		Sediment			-21.48	4.71
S310		Sediment			-21.7	3.96
S105		Sediment			-21.98	3.94
S309		Sediment			-21.98	4.97
S408		Sediment			-22.54	2.79
S308		Sediment			-22.39	4.19
S410		Sediment			-23.01	5.58
S404		Sediment			-29.38	4.25
S107		Sediment			-22.52	4.04
S307		Sediment			-21.88	3.89
S301		Sediment			-24.95	6.95
S401		Sediment			-23.85	6.89
S201		Sediment			-21.64	4.97
S411		Sediment			-23.54	5.88
S204		Sediment			-22.07	5.83
S306		Sediment			-22.37	5.56
S409		Sediment			-22.22	5
S302		Sediment			-23.41	5.66
S402		Sediment			NA	NA
S403		Sediment			-23.73	5.58
S106		Sediment			-22.14	5.8
S407		Sediment			-22.03	6.83
S412		Sediment			-23.14	6.75
S304		Sediment			-22.64	6.05
S405		Sediment			-24.29	7.07
S406		Sediment			-22.45	6.13
					-22.777	4.69
S305	S305-01	Clam	L	4.9	-19.816	6.639
S304	S304-03	Clam	L	3.5	-19.966	6.059
S307	S307-01	Clam	L	4.5	-19.556	6.08
S109	S109-03	Clam	L	4.5	-19.97	6.476
					-19.827	6.3135
S304	S304-01	Clam	O	5.3	-18.479	8.286
S104	S104-01	Clam	O	4.5	-18.982	7.17
S401	S401-01	Clam	O	5.5	-18.82	7.428
S104	S104-02	Clam	O	4.5	NA	NA
S109	S109-01	Clam	O	5	-19.173	7.287
S105	S105-03	Clam	O	4.5	-19.416	6.964
S304	S304-02	Clam	O	4.9	-18.989	7.47
S401	S401-02	Clam	O	5.25	-18.764	7.386
S105	S105-02	Clam	O	5	-18.964	7.641
S109	S109-02	Clam	O	4.25	-18.845	7.344
S105	S105-01	Clam	O	4.25	-19.064	7.477
					-19.0307	7.367
S204	S204-01	Clam	P	6.6	-20.154	7.708
S404	S404-02	Clam	P	6.3	-19.31	6.952
S302	S302-01	Clam	P	6.9	-19.413	6.683
S202	S202-01	Clam	P	6.4	-20.029	7.352
S101	S101-02	Clam	P	6.8	-18.731	6.648
S101	S101-04	Clam	P	6.9	-18.57	6.684
S302	S302-04	Clam	P	6.5	-18.976	7.191
S302	S302-03	Clam	P	6.9	-19.142	7.385
S101	S101-05	Clam	P	7.7	-19.165	6.573
S301	S301-02	Clam	P	6.1	-19.242	6.852
S102	S102-01	Clam	P	2.95	-19.638	5.66
S404	S404-04	Clam	P	6.2	-19.035	6.598
S404	S404-03	Clam	P	5.7	-19.198	6.957
S404	S404-05	Clam	P	6.3	-18.609	8.042
S403	S403-01	Clam	P	5.9	-19.341	7.68
S101	S101-01	Clam	P	6.1	-17.142	7.787
S101	S101-03	Clam	P	6.8	-18.703	7.369
S301	S301-01	Clam	P	6.4	-18.799	7.131
S302	S302-02	Clam	P	6.8	-19.042	7.511
S404	S404-01	Clam	P	6.3	-18.546	7.65
					-19.0392	7.12065
S101		POM			-24.602	NA
S102		POM			-20.3	5.953
S103		POM			-21.092	4.737
S104		POM			-21.465	4.21
S105		POM			-20.387	5.773
S106		POM			-20.164	5.359
S107		POM			-19.701	5.24
S108		POM			-20.488	5.087
S109	POM			-20.396		5.087
S201	POM			-20.476		4.279
S202	POM			-22.661		5.809
S203	POM			-20.932		6.681
S204	POM			-21.476		6.8
S205	POM			-22.915		5.66
S301	POM			-21.89		3.399
S302	POM			-24.042		NA
S303	POM			-22.737		5.753
S304	POM			-22.057		5.735
S306	POM			-19.919		6.433
S307	POM			-20.47		5.854
S308	POM			-22.422		5.446
S309	POM			-21.317		5.17
S310	POM			-19.534		6.637
S401	POM			-20.698		5.99
S402	POM			-24.455		4.096
S403	POM			-21.923		5.122
S404	POM			-24.48		5.377
S405	POM			-21.589		4.998
S406	POM			-20.306		4.928
S407	POM			-20.894		4.343
S408	POM			-19.702		4.605
S409	POM			-19.927		4.656
S410	POM			-19.181		4.301
S411	POM			-20.234		4.929
S412	POM			-21.737		5.248
				-21.3305		5.26348
S3M1	Shrimp		s	-14.104		12.79
S4M2	Shrimp		s	-14.068		12.394
S1M1	Shrimp		s	-14.205		11.729
S2M3	Shrimp		s	-14.253		12.192
M2M2	Shrimp		s	-14.161		12.78
S401	Shrimp		s	-14.617		11.794
S202	Shrimp		s	-14.256		13.229
S4M3	Shrimp		s	-14.759		12.356
S4M1	Shrimp		s	-14.53		12.772
S3M2	Shrimp		s	-14.047		12.703
S2M1	Shrimp		s	-14.544		12.939
S302	Shrimp		s	-13.178		12.447
S301	Shrimp		s	-13.999		12.529
S101		Shrimp	s		-14.21	11.56
S204		Shrimp	s		-14.365	12.931
S404		Shrimp	s		-13.819	12.675
S403		Shrimp	s		-14.744	12.44
S402		Shrimp	s		-14.967	10.906
S102		Shrimp	s		-13.926	11.198
				-14.2501		12.3349
S304	S304-04	Clam	T	13.3	-19.522	7.756
S401	S401-03	Clam	Y	5.25	-19.123	6.605
S313	S313-20	Clam	Y	7.2	-18.686	7.952
					-18.9045	7.2785
